# Supplementary material
Source: PubMed Central journal article supplement (PMC3516386)
Supplement: NIHMS384185-supplement-supplemental_material.pdf [file NIHMS384185-supplement-supplemental_material.pdf]

SUPPLEMENTAL MATERIAL

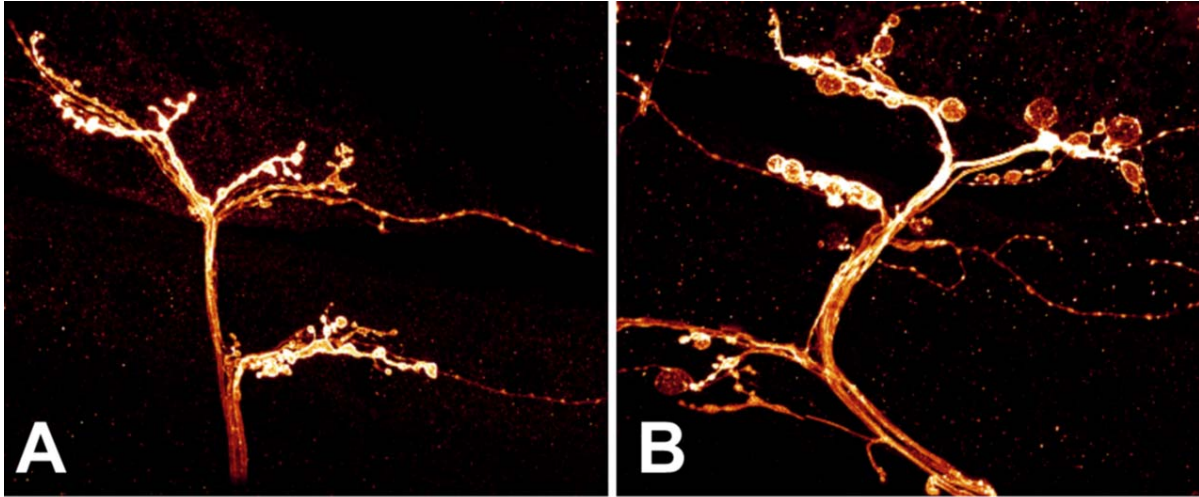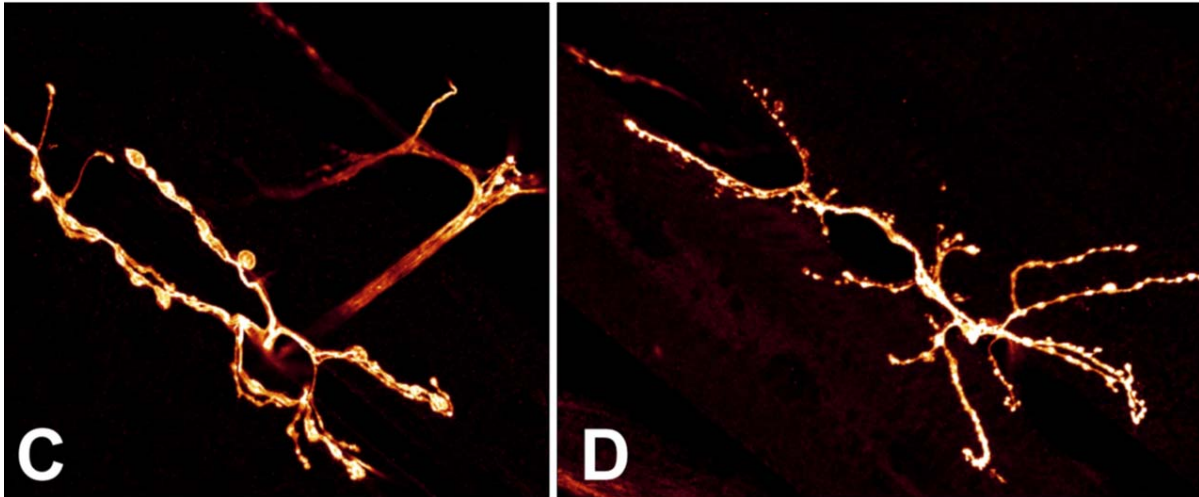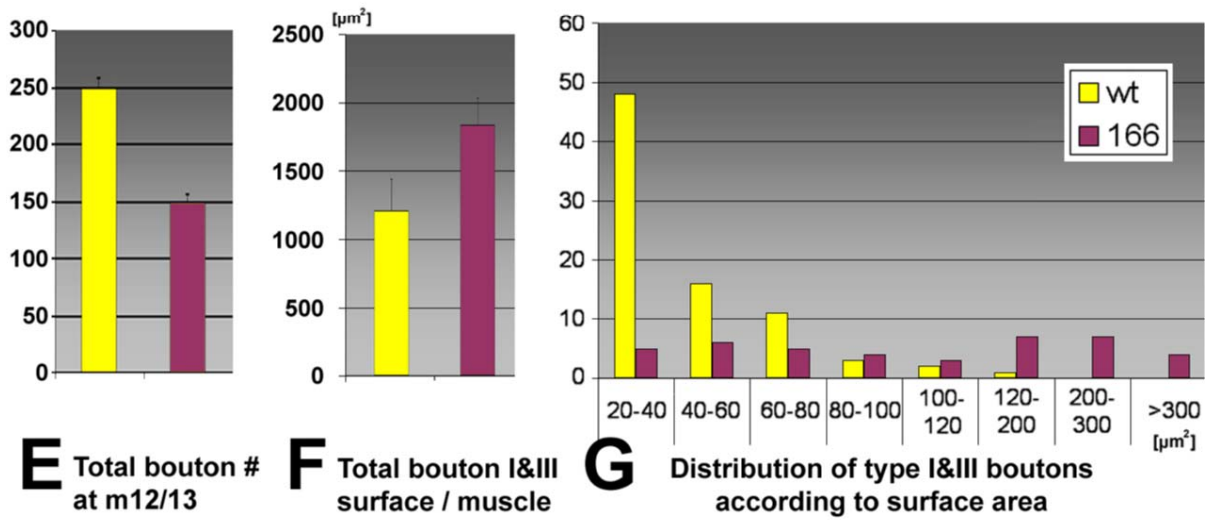

**Figure S1.** Changes in number and size of boutons at NMJs lacking and overexpressing DVAP-33A. (A and C) Anti-HRP staining of controls. (B) *DVAP-33A<sup>A166</sup>* mutant (166) NMJs stained with the same antibodies. (D) UAS-DVAP-33A overexpressing NMJs stained with anti-HRP antibodies. (E) Quantification of the total number of boutons in control and 166 mutant NMJs. (F) Total surface area per muscle for the reported genotypes. (G) Calculation of the distribution in synaptic bouton area for the relevant genotypes. A revertant line was used as a control in (A) while in (C) the UAS-DVAP-33A line without the driver was used as a control. *DVAP-33A<sup>A166</sup>* mutants exhibit only  $150 \pm 7$  boutons while controls contain  $250 \pm 8$  boutons ( $P < 0.001$ ,  $n=10$  larvae). Similar to null mutations, a decrease in number of boutons and an increase in their size is observed in *DVAP-33A<sup>A166</sup>* hypomorphic mutations (see text). The total number of boutons on muscles 12 and 13 was counted. Conversely, neuronal overexpression of *DVAP-33A* induces a dramatic increase in the number of boutons ( $300 \pm 7$  versus  $180 \pm 8$ ,  $P < 0.001$ ,  $n=12$  larvae) with a concomitant decrease in their size (C and D). In this case, the total number of boutons on muscles 6 and 7 was counted.



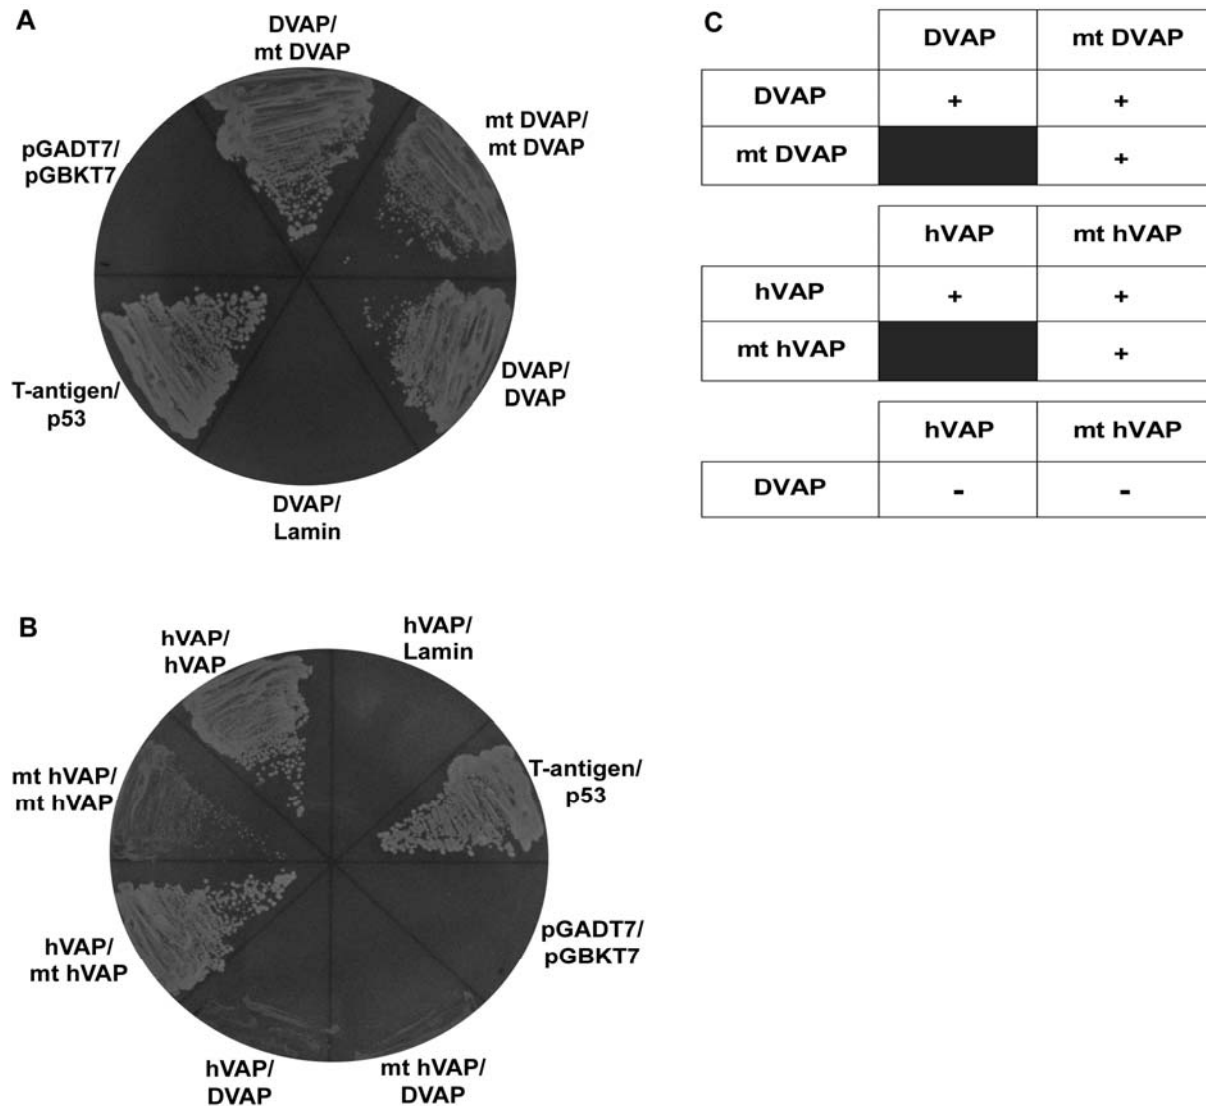

**Figure S3.** Self-oligomerization of wt VAP proteins and mutant VAP proteins detected by yeast two hybrid system. **(A)** Analysis of DVAP-33A (DVAP) and DVAPP58S (mt DVAP) self-oligomerization. **(B)** Homodimerization of hVAPB (hVAP) and hVAPBP56S (mt hVAP); oligomerization of hVAPB with DVAP-33A (hVAP/DVAP) and hVAPBP56S with DVAP-33A (mt hVAP/DVAP). Yeast co-transformed with the indicated constructs in – HALT medium. T-antigen/p53 represents a positive control. pGADT7/pGBKT7 and VAP/lamin represent negative controls. **(C)** Summary of the interactions: "+" represents an interaction, "-" represents no interaction. Black boxes denote interactions reported elsewhere in the table.

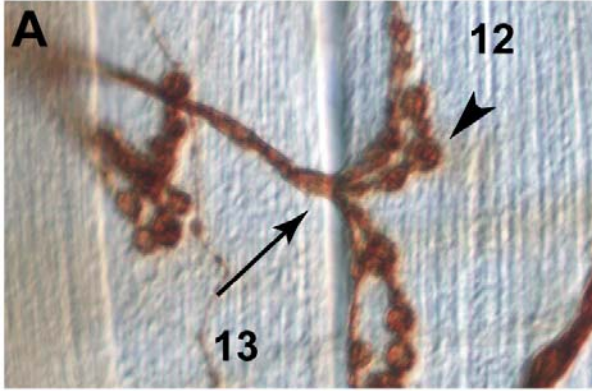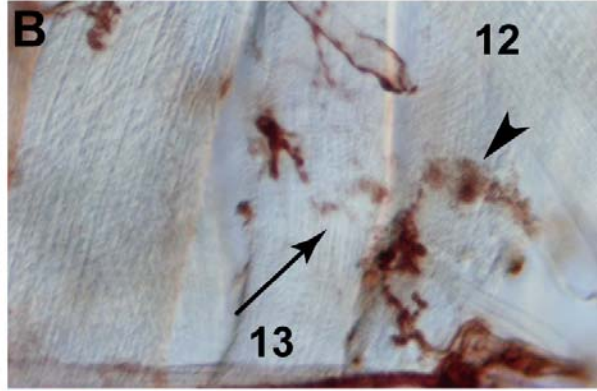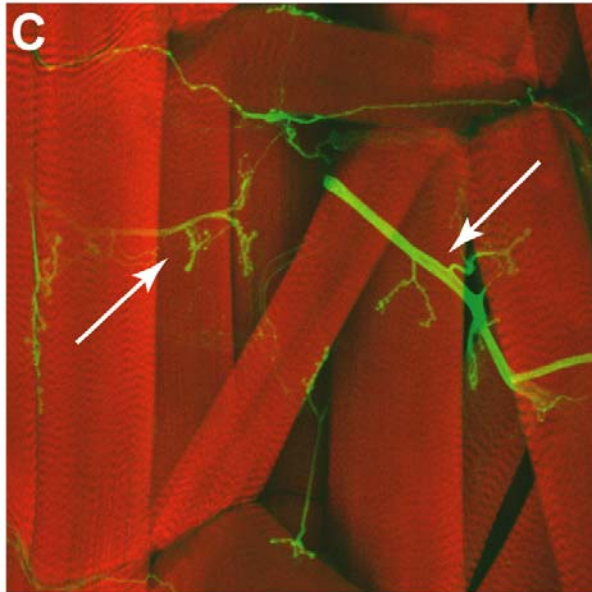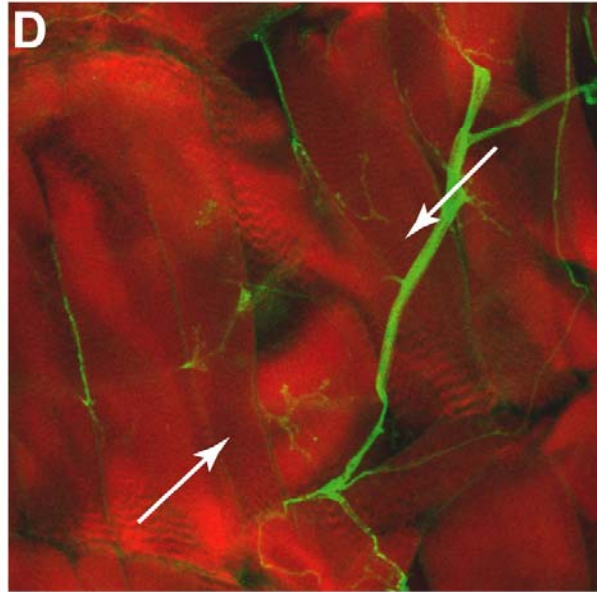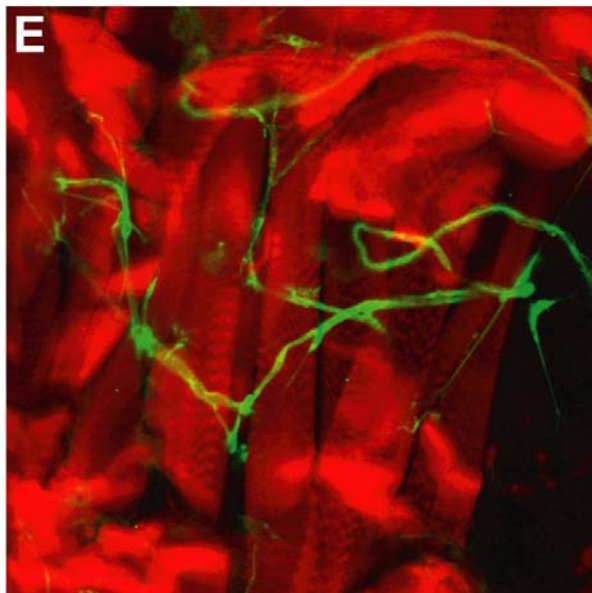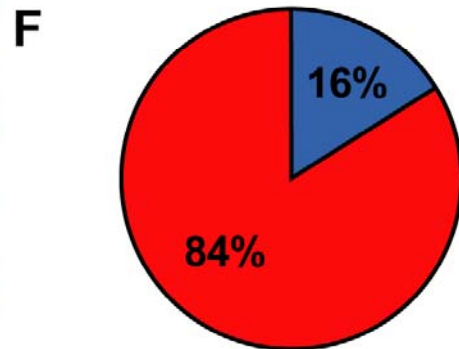

- Several sporadic disorganised muscles
- At least half the muscles disorganised and a localized region severely disrupted

**Figure S4.** Transgenic expression of DVAPP58S in neurons induces nerve fragmentation and muscle wasting. (A) Anti-HRP immunohistochemistry of control NMJs. (B) NMJs expressing transgenic DVAPP58S stained with the same antibodies as in (A). (C) Anti-HRP immunohistochemistry and phalloidin staining in control synapses. (D and E) Transgenic DVAPP58S expressing synapses subjected to anti-HRP and phalloidin stainings. (F) Quantification of the mutant phenotype. In wt larvae, the motor axon entering the neuromuscular junction is thick and terminal branches contact and sprout on muscle fibers to form a stereotypic arbor (A). Transgenic DVAPP58S expressing synapses exhibit a high range of abnormal morphologies: nerves at the point where they branch onto the muscle fibers are fragmented and the corresponding synapses are not connected to the nerve (compare arrows in C and D). In other cases, the branching nerve is not visible (compare arrows in B and A) and synapses become a highly disorganized, degenerating structure (compare arrowheads in B and A). These synapses contact muscles that exhibit an aberrant morphology when observed by Nomarski optics. The integrity of the muscles at these NMJs was assessed by staining with fluorescence-conjugated phalloidin. In the majority of DVAPP58S transgenic larvae (84%), approximately half of the muscles exhibit an aberrant morphology when compared to controls. Muscles are deformed and slender and exhibit an altered striated pattern (D versus C). In addition, a localized region of severe muscle disruption was observed: muscles become detached from the body wall insertion sites, and muscle loss is accompanied with some remnants of muscle fibers (E). In the remaining 16% of the larvae, sporadic disorganized muscles were observed (F and data not shown). Canton S larvae were used as control in all the experiments reported in this figure. At least 10 larvae per experiment were analyzed.

## **MATERIALS AND METHODS**

### **Yeast two hybrid interaction**

Yeast two-hybrid experiments were performed using the Clontech (Cambridge, UK) Matchmaker system. To analyze the ability of homodimerizing of DVAP-33A and hVAPB as well as of the corresponding protein carrying the ALS8 mutation, the respective cDNAs

were cloned in-frame in pGBKT or in pGAD vectors. Protein interactions were analyzed in media lacking histidine, adenine, leucine and tryptophane (-HALT medium) and containing  $\alpha$ -galactosidase following transformation in AH109 yeast strain with the indicated plasmids. In all experiments, pGBKT7-p53/pGADT7-T antigen co-transformation was used as positive control. Negative controls were the co-transformations with the empty vectors pGADT7/pGBKT7 and phVAPB/lamin or pDVAP33A/lamin.
